# Supplementary material
Source: Research Square preprint supplement (doi:10.21203/rs.3.rs-9464587/v1)
Supplement: Supplementary file 1 [file 2956c0b905cd804a5a6a3dde.docx]

**Table 2. Descriptive Analysis of the Older People’s Quality of Life (OPQOL) Scale**

|  | **No. of items** | **Possible range** | **Observed range** | **M** | **SD** |
| --- | --- | --- | --- | --- | --- |
| **Life overall** | **4** | **4-20** | **4-20** | **3.54** | **0.80** |
| I enjoy my life |  |  |  | 3.80 | 1.18 |
| I'm happy much of the time |  |  |  | 3.70 | 1.04 |
| I'm look forward to things |  |  |  | 3.67 | 1.02 |
| Life gets me down |  |  |  |  |  |
| **Health** | **4** | **4-20** | **4-19** | **3.06** | **0.68** |
| I have a lot of physical energy |  |  |  | 3.37 | 1.10 |
| Pain affects my well-being |  |  |  | 2.65 | 1.04 |
| My health restricts me looking After myself or home |  |  |  | 2.72 | 1.25 |
| I'm healthy enough to get out and about |  |  |  | 3.51 | 1.24 |
| **Social relationships** | **5** | **5-25** | **7-25** | **3.26** | **0.50** |
| My family, friends or neighbors would help me if needed |  |  |  | 3.95 | 1.01 |
| I would like more companionship or contact with other people |  |  |  | 2.35 | 1.09 |
| I have someone who gives me love and affection |  |  |  | 3.59 | 1.16 |
| I’d like more people to enjoy live with |  |  |  | 2.66 | 1.124 |
| I have my children around which is important |  |  |  | 3.74 | 1.17 |
| **Independence, control, and freedom** | **4** | **4-20** | **6-20** | **3.43** | **.64** |
| I am healthy enough to have my independence |  |  |  | 3.79 | 1.04 |
| I can please myself what I do |  |  |  | 3.73 | .99 |
| The cost of things compared to my pension/income restricts my life |  |  |  | 2.45 | 1.12 |
| I have a lot of control over the important things in my life |  |  |  | 3.75 | 1.04 |
| **Home and neighborhood** | **4** | **4-20** | **7-20** | **4.02** | **0.71** |
| I feel safe where I live |  |  |  | 4.28 | 0.89 |
| The local shops, Service and facilities good overall |  |  |  | 3.92 | 1.15 |
| I get pleasure from my home |  |  |  | 3.90 | 0.91 |
| I find my neighborhood friendly |  |  |  | 3.96 | 0.93 |
| **Psychological and emotional well-being** | 4 | 4-20 | 6-20 | **3.92** | 0.79 |
| I take life as it comes and make the best of things |  |  |  | 4.03 | 0.92 |
| I feel lucky compared to most people |  |  |  | 3.90 | 1.00 |
| I tend to look on the bright side |  |  |  | 3.96 | 0.99 |
| If my health limits social/leisure activities, then I will compensate and find something else I can do |  |  |  | 3.80 | 1.00 |
| **Financial circumstances** | **4** | **4-20** | **4-20** | **3.34** | **0.79** |
| I have enough money to pay for household bills |  |  |  | 3.56 | 1.11 |
| I have enough money to pay for household repairs or help needed in the |  |  |  | 3.58 | 1.09 |
| I can afford to buy what I want to |  |  |  | 3.43 | 0.95 |
| I cannot afford to do things I would enjoy |  |  |  | 2.78 | 1.25 |
| **Leisure, activities, and religion/culture** | **6** | **6-30** | **12-29** | **3.60** | **0.53** |
| I have social or leisure activities/hobbies that I enjoy doing |  |  |  | 3.66 | 1.13 |
| I try to stay involved with things |  |  |  | 3.61 | 1.04 |
| I do paid or unpaid work or activities that give me a role in life |  |  |  | 3.38 | 1.29 |
| I have responsibilities to others that restrict my social or leisure activities |  |  |  | 2.81 | 1.33 |
| Religion, belief or philosophy is important to my quality of life |  |  |  | 4.30 | 0.75 |
| Cultural/religious events/festivals are important to my quality of life |  |  |  | 3.83 | 1.06 |
| **QOL total score** | **35** | **35-175** | **72-158** | **123.25** | **16.35** |
| **QOL total mean score** | **35** | **1-5** | **2.06-4.51** | **3.52** | **0.47** |
