# Supplementary material
Source: Research Square preprint supplement (doi:10.21203/rs.3.rs-9464587/v1)
Supplement: Supplementary file 2 [file 3080662074e1d33a0cbcb599.docx]

**Supplementary Table 1. Descriptive Statistics for the Facts on Aging Quiz Total Score (N =130)**

| **Item** |  | **Correct n (%)** | **Incorrect n(%)** |
| --- | --- | --- | --- |
| AQ1 | Majority of older adults have Alzheimer’s disease | 79 (60.8%) | 51 (39.2%) |
| AQ2 | Intelligence declines significantly with age | 60 (46.2%) | 70(53.8%) |
| AQ3 | It is difficult for older adults to learn new things | 33 (25.4%) | 97(74.6%) |
| AQ4 | Personality changes with age | 24 (18.5%) | 106(81.5%) |
| AQ5 | Memory loss is a normal part of aging | 105(80.8%) | 25(19.2%) |
| AQ6 | Reaction time increases with age | 103(79.2%) | 27(20.80%) |
| AQ7 | Depression occurs more frequently in older adults | 32(24.6%) | 98(75.4%) |
| AQ8 | Older adults are at risk for HIV/AIDS | 36(27.7%) | 94(72.3%) |
| AQ9 | Older adults have more trouble sleeping | 116(89.2%) | 14(10.9%) |
| AQ10 | Older adults have highest suicide rate | 73(56.2%) | 57(43.8%) |
| AQ11 | High blood pressure increases with age | **130(100%)** | ----------- |
| AQ12 | Older adults perspire less → hyperthermia risk | 105(80.8%) | 25(19.2%) |
| AQ13 | All women develop osteoporosis | 19(14.60) | 111(85.4%) |
| AQ14 | Height declines in old age | 118(90.8%) | 12(9.2%) |
| AQ15 | Physical strength declines | **124(95.4%)** | 6(4.6%) |
| AQ16 | Older adults lose interest in sex | 21(16.2%) | 109(83.8%) |
| AQ17 | Bladder capacity decreases with age | 121(93.1%) | 9(6.9%) |
| AQ18 | Kidney function not affected by age | 71(54.6%) | 59(45.4%) |
| AQ19 | Constipation is normal in aging | 16(12.3%) | 114(87.7%) |
| AQ20 | All five senses decline with age | 98(75.4%) | 32(24.6%) |
| AQ21 | More chronic than acute conditions with age | 113(86.9%) | 17(13.1%) |
| AQ22 | Retirement is detrimental to health | 37(28.5%) | 93(71.5%) |
| AQ23 | Older adults less anxious about death | 86(66.2%) | 44(33.8%) |
| AQ24 | Most older people live in nursing homes | 75(57.7%) | 55(42.3%) |
| AQ25 | Families no longer care for elders | 38(29.2%) | 92(70.8%) |
| AQ26 | Life expectancy at 65 same for men and women | 54(41.5%) | 76(58.5%) |
| AQ27 | Most older drivers are capable | 90(69.2%) | 40(30.8%) |
| AQ28 | Older workers less effective | 12(9.2%) | 118(90.8%) |
| AQ29 | Older adults unable to change | 30(23.1%) | 100(76.9) |
| AQ30 | Majority of older adults are bored | 14(10.8%) | 116(89.2%) |
| AQ31 | Most older people are alike | 39(30%) | 91(70%) |
| AQ32 | Higher crime victimization in 65+ | 52(40%) | 78(60%) |
| AQ33 | Older adults become more spiritual | 118(90.8%) | 12(9.2%) |
| AQ34 | Older adults more fearful of crime | 20(15.4%) | 110(84.6%) |
| AQ35 | Older adults adapt poorly to relocation | 13(10%) | 117(90%) |
| AQ36 | Volunteering declines in older adults | 17(13.1%) | 113(86.9%) |
| AQ37 | Disengagement increases happiness | 51(39.2%) | 79(60.8%) |
| AQ38 | All medical schools require geriatrics | 28(21.5%) | 102(78.5%) |
| AQ39 | Grandparents take less responsibility now | 24(18.5%) | 106(81.5%) |
| AQ40 | Older adults recover more slowly from stress | **122(93.8%)** | 8(6.2%) |
| AQ41 | Most older adults rate health good/excellent | 78(60%) | 52(40%) |
| AQ42 | Older females practice better health behaviors | 106(81.5%) | 24(18.5%) |
| AQ43 | Old age truly begins at 65 | 34(26.2%) | 96(73.8%) |
| Total Score | Total score of Facts on Ageing Quiz | 27.91%-65.12% | |

**Note. Items were scored dichotomously (1 = correct, 0 = incorrect). Percentages are based on valid responses.**
